# Supplementary material
Source: publisher site journal article supplement (https://www.dovepress.com/get_supplementary_file.php?f=412348.docx)
Supplement: Supplementary file 1 [file get_supplementary_file.php]

Supplementary Table 1 The basic information of the participating hospitals

| **Hospital** |  | **AHSLYY** | **AYFY** | **BYFY** | **HQYY** | **JZZXYY** | **LASLYY** | **QYSRMY** | **SDSLYY** | **XAJDEY** | **XYYFY** | **YCSRMYY** |
| --- | --- | --- | --- | --- | --- | --- | --- | --- | --- | --- | --- | --- |
| Hospital Level |  | Tertiary hospital | Tertiary hospital | Tertiary hospital | Tertiary hospital | Tertiary hospital | Secondary hospital | Tertiary hospital | Tertiary hospital | Tertiary hospital | Tertiary hospital | Tertiary hospital |
| Total bed size |  | 5750 | 4990 | 1900 | 1200 | 1200 | 600 | 1760 | 3389 | 2580 | 900 | 1510 |
| Participating Wards  (Beds) |  | Haematology ward（148） | Haematology ward（52） | Respiratory ward（72） | Respiratory ward（90） | Infectious disease ward（35） | Neurology ward（75） | Neurology ward（116） | Gastroenterology ward（55） | Haematology ward（65） | Internal Medicine（35） | Emergency department（30） |
|  | Emergency department（54） | Infectious disease ward（136） | Haematology ward（42） | Infectious disease ward（30） | Haematology ward（80） | Respiratory ward（50） | Respiratory ward（40） | Oncology ward（120） | Emergency department（31） | Neurology ward（82） | Gastroenterology ward（120） |
|  | ICU（60） | ICU（50） | ICU（35） | ICU（30） | ICU（20） | ICU（15） | ICU（19） | ICU（45） | ICU（12） | Respiratory ward（83） | ICU（30） |
|  | - | - | Internal oncology ward（25） | Neurosurgery ward（70） | Urology ward（80） | Cardiovascular ward（90） | Neurosurgery ward（116） | - | Respiratory ward（134） | Neurosurgery ward（46） | Haematology ward（55） |
|  | Mouse pad, posters | 6/21 | 5/19 | 6/21 | 5/13 | 6/22 | 4/12 | 5/22 | 6/28 | 5/26 | 4/22 | 6/25 |
| Education form and number | Staff Meeting | 2 | 2 | 2 | - | 4 | - | - | - | - | - | 7 |
| Topic | 10 | 10 | 7 | 16 | 6 | 8 | 4 | 6 | - | 24 | 9 |
| Salon | 3 | 5 | - | - | - | - | 4 | 10 | - | - | - |
| Presentation | - | - | - | 1 | - | - | - | - | - | 1 | - |
| Others* | 5 | 5 | - | 4 | 6 | - | 4 | - | 15 | 24 | - |
|  | Pre-implementation period | 357 | 345 | 313 | 426 | 182 | 235 | 196 | 127 | 81 | 146 | 332 |
| CRF collected | Post-implementation period | 705 | 411 | 366 | 350 | 180 | 499 | 265 | 135 | 154 | 145 | 352 |
|  | Total | 1062 | 756 | 679 | 776 | 362 | 734 | 461 | 262 | 235 | 291 | 684 |

*Others: Staff meeting, MDT

Supplementary table 2 The detection of coagulase negative staphylococci in different wards

|  | Total | Pre-implementation period | Post-implementation period | *P* |
| --- | --- | --- | --- | --- |
| Total sets of BC | 6299 | 2740 | 3559 |  |
|  |  |  |  | 0.506 |
| CNS detected only in one bottle of a set | 112 (1.78) | 50 (1.82) | 62 (1.74) |  |
| CNS detected in two or more bottles of a set | 38 (0.60) | 20 (0.73) | 18 (0.51) |  |
| Total sets of BC in Emergency department | 552 | 222 | 330 |  |
|  |  |  |  | 0.122 |
| CNS detected only in one bottle of a set | 12 (2.17) | 2 (0.90) | 10 (3.03) |  |
| CNS detected in two or more bottles of a set | 2 (0.36) | - | 2 (0.61) |  |
| Total sets of BC in ICU | 1959 | 759 | 1200 |  |
|  |  |  |  | 0.143 |
| CNS detected only in one bottle of a set | 38 (1.94) | 12 (1.58) | 26 (2.17) |  |
| CNS detected in two or more bottles of a set | 23 (1.17) | 13 (1.71) | 10 (0.83) |  |
| Total sets of BC in Infectious disease ward | 679 | 319 | 360 |  |
|  |  |  |  | 0.708 |
| CNS detected only in one bottle of a set | 3 (0.44) | 1 (0.31) | 2 (0.56) |  |
| CNS detected in two or more bottles of a set | 3 (0.44) | 2 (0.63) | 1 (0.28) |  |
| Total sets of BC in Internal medicine ward | 1149 | 487 | 662 |  |
|  |  |  |  | 0.018 |
| CNS detected only in one bottle of a set | 35 (3.05) | 22 (4.52) | 13 (1.96) |  |
| CNS detected in two or more bottles of a set | 4 (0.35) | 3 (0.62) | 1 (0.15) |  |
| Total sets of BC in other wards | 1878 | 935 | 943 |  |
|  |  |  |  | 0.586 |
| CNS detected only in one bottle of a set | 23 (1.22) | 13 (1.39) | 10 (1.06) |  |
| CNS detected in two or more bottles of a set | 6 (0.32) | 2 (0.21) | 4 (0.42) |  |

BC: Blood culture; CNS: coagulase negative staphylococci
